# Supplementary material for: A smartphone-based device for simultaneous measurement of ratiometric fluorescence and absorbance demonstrated by the determination of hypochlorous acid
Source: Royal Society of Chemistry journal article supplement (doi:10.1039/d2nj03106j), 2022-01-01
Supplement: d2nj03106j1.pdf [file d2nj03106j1.pdf]

## Electronic supplementary information

### **A smartphone-based device for simultaneous measurement of ratiometric fluorescence and absorbance demonstrated by the determination of hypochlorous acid**

Jianzhi Dou,<sup>a</sup> Qirui Shen,<sup>b</sup> Yan Yang,<sup>b</sup> Haiyan Song<sup>b</sup> and Dazhong Shen<sup>\*b</sup>

<sup>a</sup> School of Applied Chemistry, Food and Drug, Weifang Engineering Vocational College,  
Qingzhou 262500, PR China

<sup>b</sup>College of Chemistry, Chemical Engineering and Materials Science, Collaborative  
Innovation Center of Functionalized Probes for Chemical Imaging in Universities of  
Shandong, Shandong Normal University, Jinan 250014, P. R. China

-----

\*Corresponding author:

E-mail address: dzshen@sdsnu.edu.cn (D. Shen).

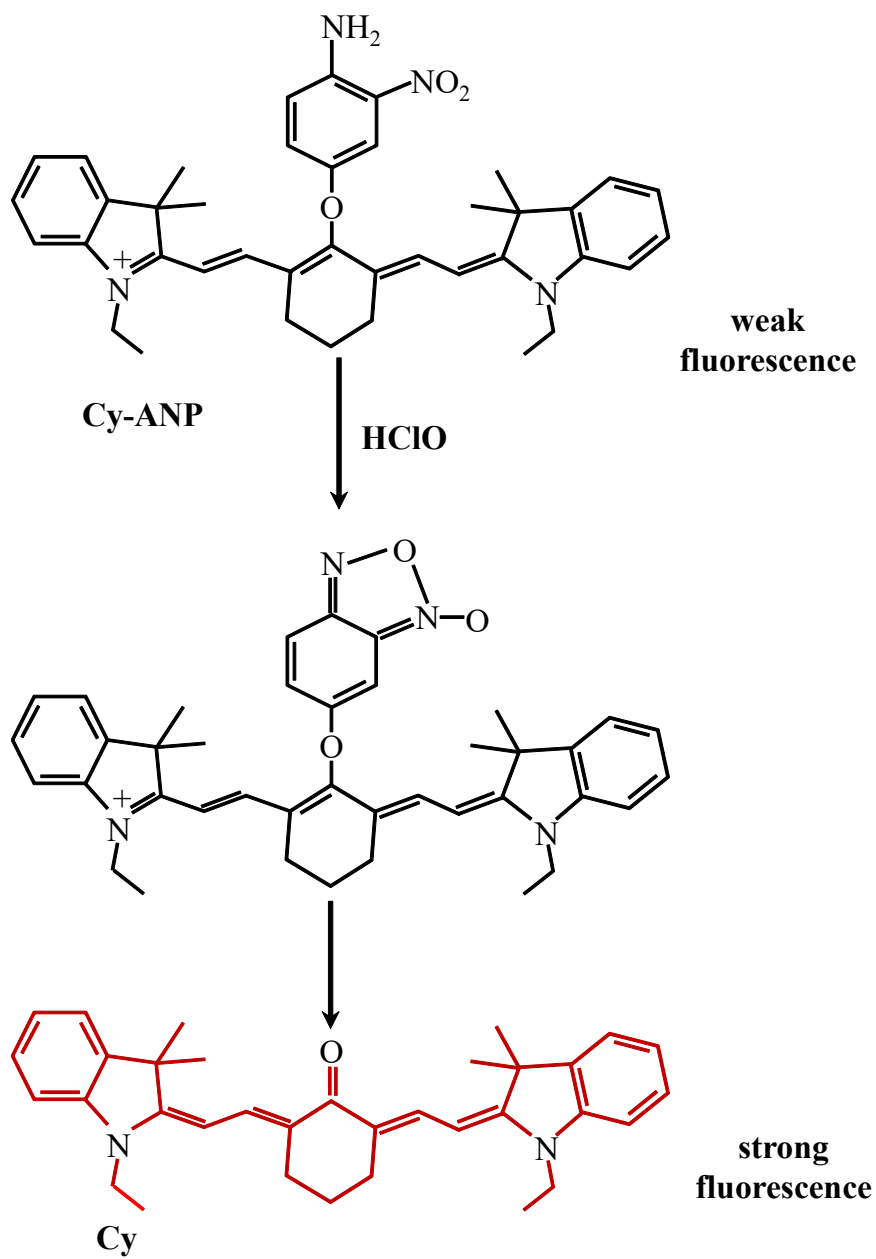

**Scheme S1.** Structural formula of Cy-ANP probe and detection mechanism to HClO.

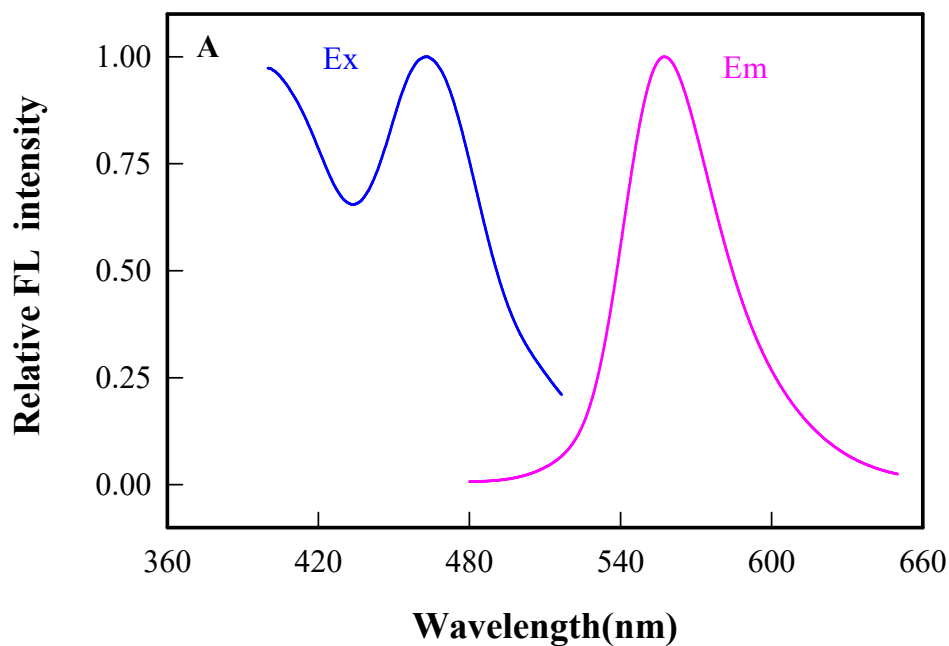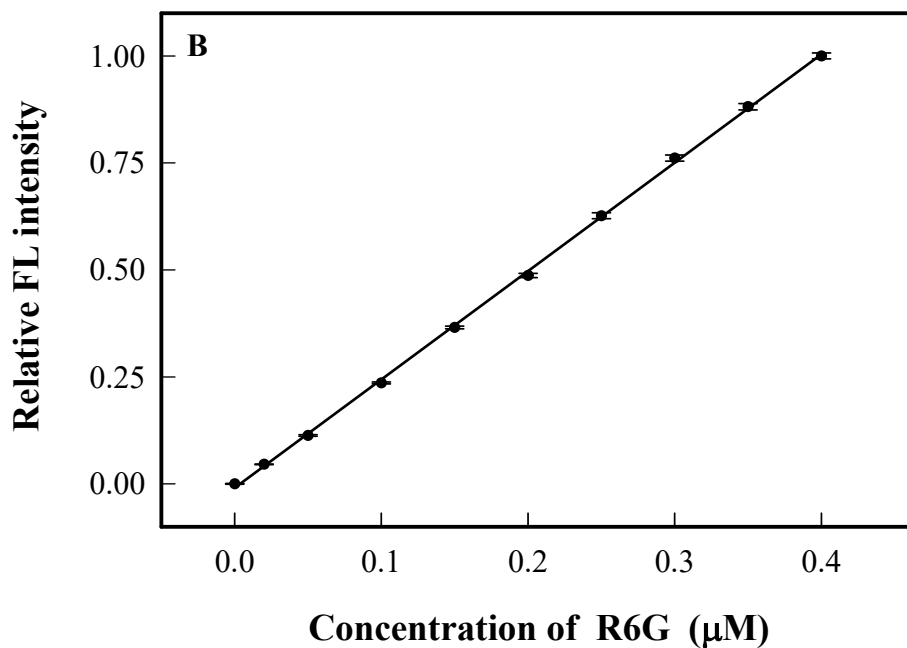

**Fig. S1** Excitation (blue line) and emission (pink line) fluorescence spectra of R6G (A), dependence of the fluorescent intensity on the concentration of R6G (B). The fluorescence intensity was measured by F-7100 spectrofluorophotometer. The error bars represent the standard deviation of three parallel determinations.

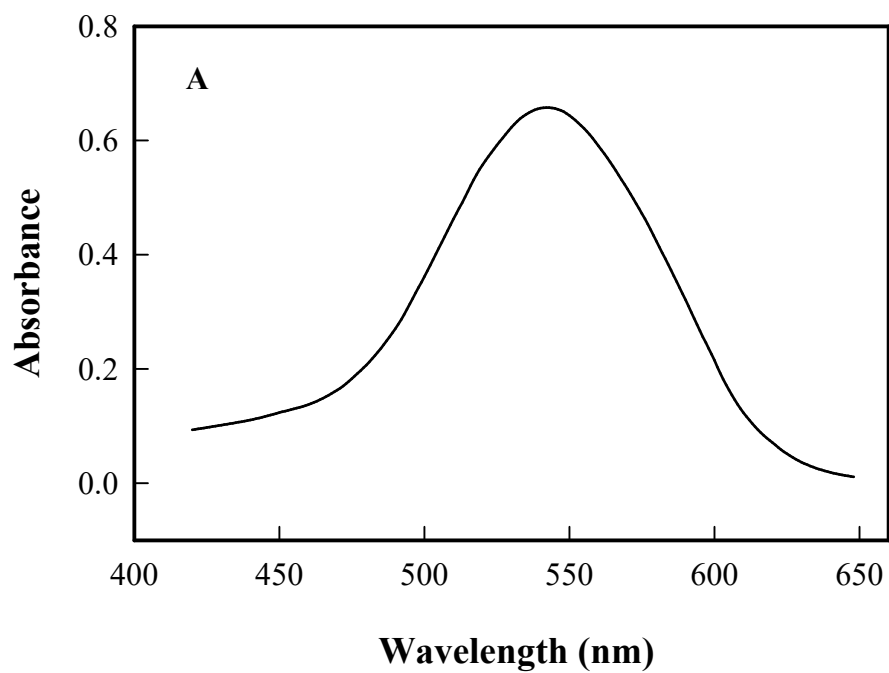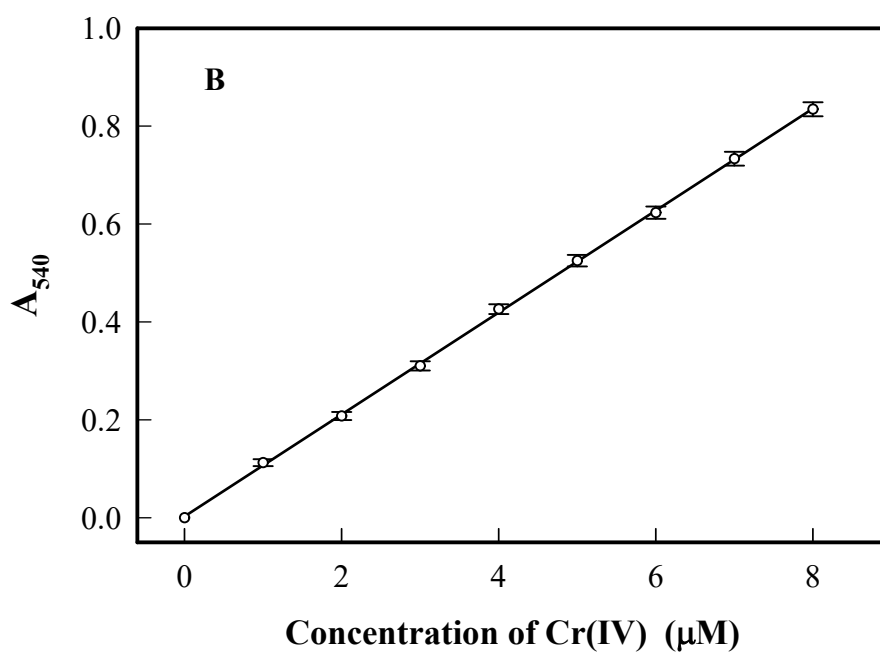

**Fig. S2** Absorption spectrum of DPC-Cr(VI) reaction mixture (A) and the calibration curve for Cr(VI) determination (B) measured by UV-1700 spectrophotometer (b=10 mm cuvette).

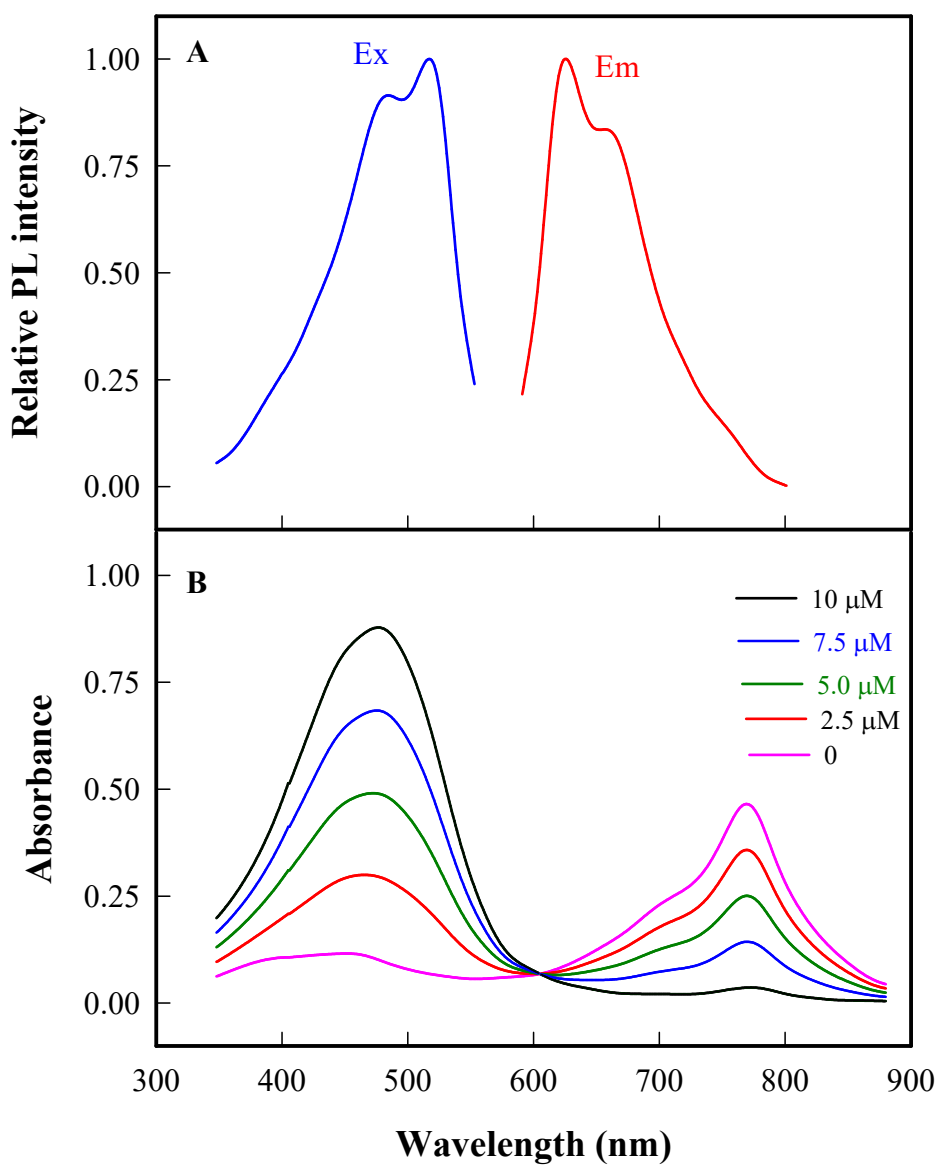

**Fig. S3** Excitation (blue line) and emission (pink line) fluorescence spectra of Cy (A) , absorbance spectra of the mixture of Cy-ANP and HClO at different concentration (B). The fluorescence and absorption spectra were measured respectively by F-7100 spectrofluorophotometer and UV-1700 spectrophotometer.

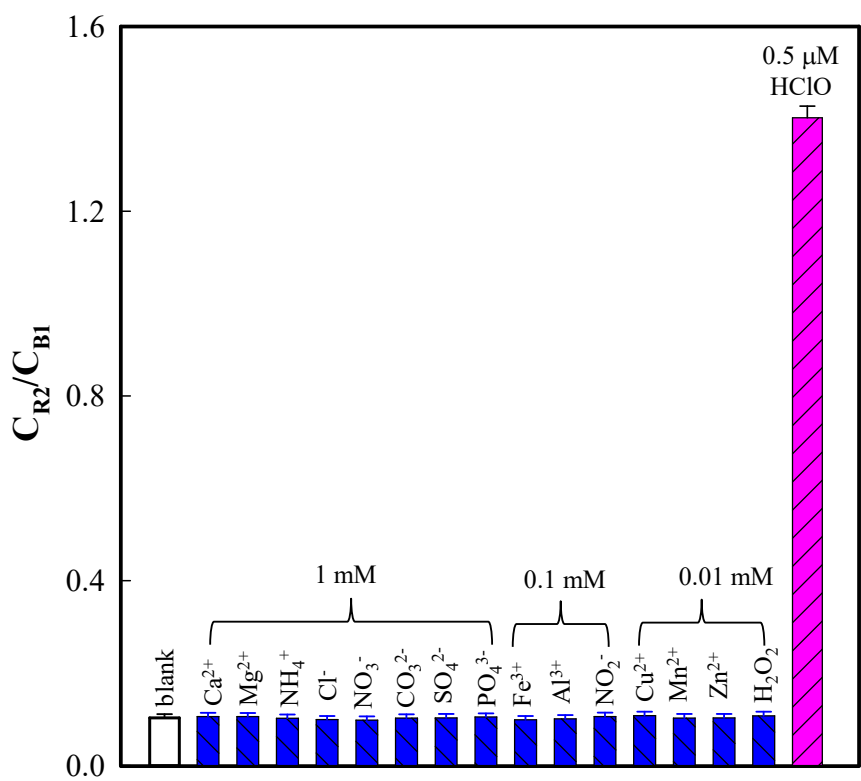

**Fig. S4.** The selectivity of the Cy-ANP fluorescent probe.
